# Supplementary material for: The Clinical Relevance of the NATALEE Study: Application of the NATALEE Criteria to a Real-World Cohort from Two Large German Breast Cancer Centers
Source: MDPI journal article supplement (doi:10.3390/ijms242216366), 2023-11-15
Supplement: s1 [file s1]

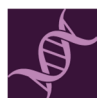

**Supplementary Table S1.** Patient characteristics for the entire study cohort.

|                          | Percentage  |      |
|--------------------------|-------------|------|
| <b>n</b>                 | 2384        | 100  |
| <b>Age</b>               | 59.0 ± 12.8 |      |
| <b>Menopausal status</b> |             |      |
| Premenopausal            | 750         | 31.5 |
| Postmenopausal           | 1575        | 66.1 |
| Male                     | 3           | 0.1  |
| n/a                      | 56          | 2.3  |
| <b>Histology</b>         |             |      |
| NST                      | 1951        | 81.8 |
| ILC                      | 301         | 12.6 |
| Other                    | 127         | 5.3  |
| n/a                      | 5           | 0.2  |
| <b>Grading</b>           |             |      |
| 1                        | 214         | 9.0  |
| 2                        | 1470        | 61.7 |
| 3                        | 694         | 29.1 |
| n/a                      | 6           | 0.3  |
| <b>T-stage</b>           | 0           |      |
| 0                        | 272         | 11.4 |
| 1                        | 1315        | 55.2 |
| 2                        | 657         | 27.6 |
| 3                        | 97          | 4.1  |
| 4                        | 43          | 1.8  |
| <b>N-stage</b>           |             |      |
| 0                        | 1712        | 71.8 |
| 1                        | 513         | 21.5 |
| 2                        | 112         | 4.7  |
| 3                        | 46          | 1.9  |
| X                        | 1           | 0.0  |
| <b>ER status</b>         |             |      |
| +                        | 1971        | 82.7 |
| -                        | 413         | 17.3 |
| <b>PR status</b>         |             |      |
| +                        | 1614        | 67.7 |
| -                        | 770         | 32.3 |
| <b>HER2 status</b>       |             |      |
| +                        | 345         | 14.5 |
| -                        | 2039        | 85.5 |
| <b>Ki67</b>              |             |      |
| ≥ 20 %                   | 1126        | 47.2 |
| < 20 %                   | 1258        | 52.8 |
| <b>Chemotherapy</b>      |             |      |
| Neoadjuvant              | 505         | 21.2 |
| Adjuvant                 | 507         | 21.3 |
| None                     | 1372        | 57.6 |

NST, non-special type; ILC, invasive lobular carcinoma; ER, estrogen receptor; PR, progesterone receptor; HER2, human epidermal growth factor receptor 2; TNBC, triple-negative breast cancer; n/a, not available.
